# Supplementary material
Source: HighWire-hosted journal article supplement (https://cmajopen-stage.highwire.org/highwire/filestream/85473/field_highwire_adjunct_files/5/2020-0188-6-at.pdf)
Supplement: 2020-0188-6-at.pdf [file 2020-0188-6-at.pdf]

10 year Health Care Perspective

## Tornado Diagram – ICER Surgery vs. Controls

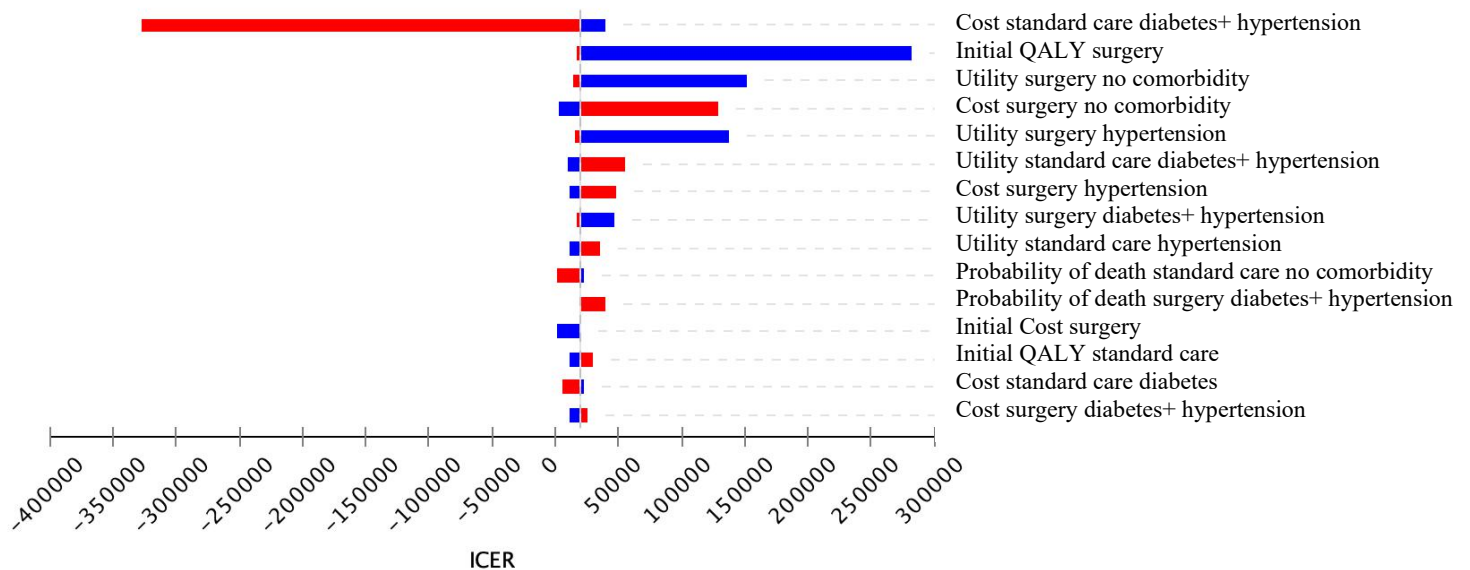

Appendix 6, as supplied by the authors. Appendix to: Lester ELW, Padwal RS, Birch DW, et al. The real world cost-effectiveness of bariatric surgery for the treatment of severe obesity: a cost–utility analysis. *CMAJ Open* 2021. DOI:10.9778/cmajo.20200188.

Copyright © 2021 The Author(s) or their employer(s). To receive this resource in an accessible format, please contact us at [cmajgroup@cmaj.ca](mailto:cmajgroup@cmaj.ca).

## Tornado Diagram – ICER Medical Therapy vs. Controls

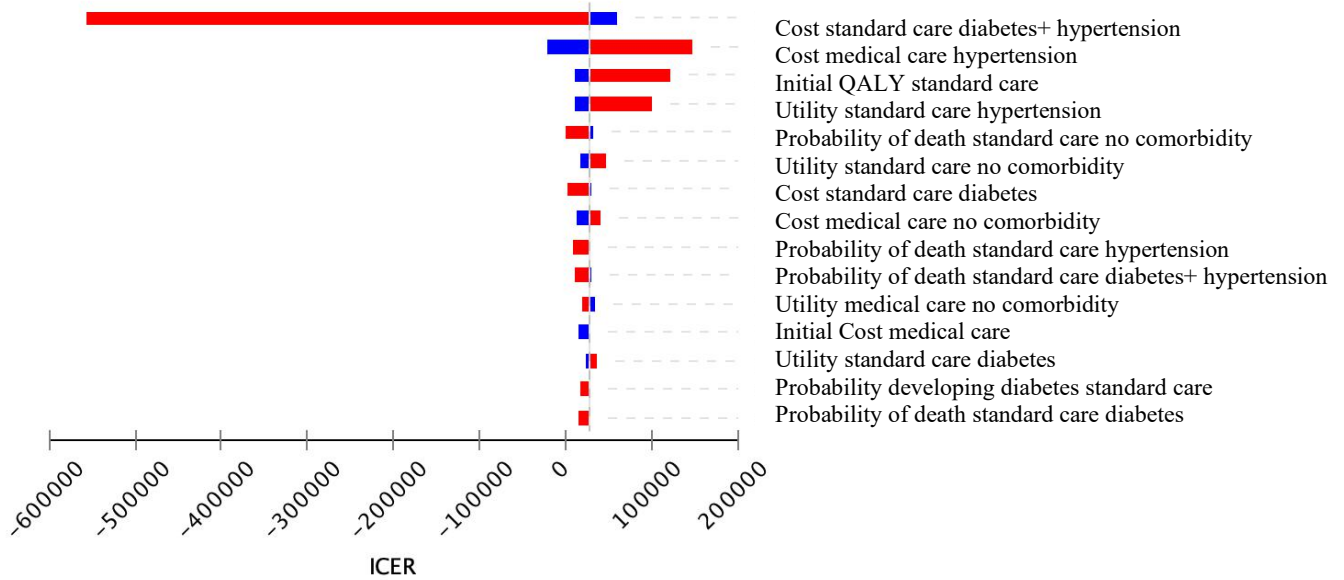

Appendix 6, as supplied by the authors. Appendix to: Lester ELW, Padwal RS, Birch DW, et al. The real world cost-effectiveness of bariatric surgery for the treatment of severe obesity: a cost–utility analysis. *CMAJ Open* 2021. DOI:10.9778/cmajo.20200188.

Copyright © 2021 The Author(s) or their employer(s). To receive this resource in an accessible format, please contact us at [cmajgroup@cmaj.ca](mailto:cmajgroup@cmaj.ca).

## Lifetime Health Care Perspective

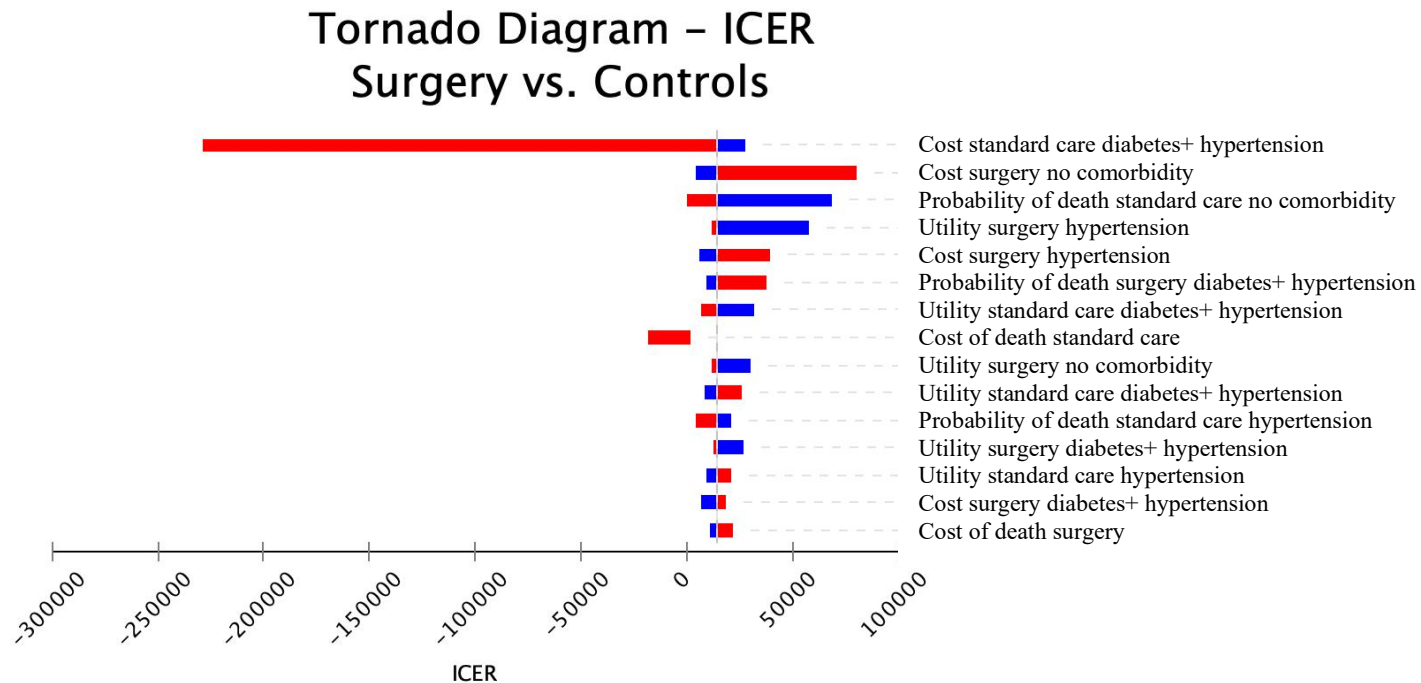

Appendix 6, as supplied by the authors. Appendix to: Lester ELW, Padwal RS, Birch DW, et al. The real world cost-effectiveness of bariatric surgery for the treatment of severe obesity: a cost–utility analysis. *CMAJ Open* 2021. DOI:10.9778/cmajo.20200188.

Copyright © 2021 The Author(s) or their employer(s). To receive this resource in an accessible format, please contact us at [cmajgroup@cmaj.ca](mailto:cmajgroup@cmaj.ca).

## Tornado Diagram – ICER Medical Therapy vs. Controls

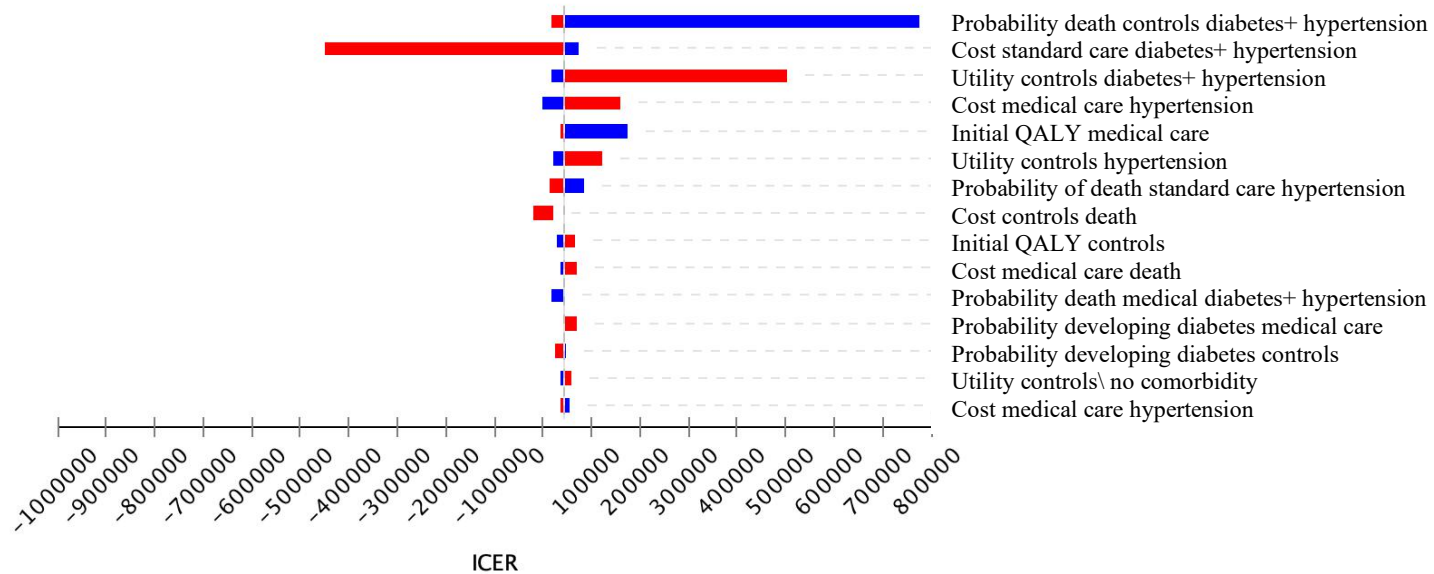

Appendix 6, as supplied by the authors. Appendix to: Lester ELW, Padwal RS, Birch DW, et al. The real world cost-effectiveness of bariatric surgery for the treatment of severe obesity: a cost–utility analysis. *CMAJ Open* 2021. DOI:10.9778/cmajo.20200188.

Copyright © 2021 The Author(s) or their employer(s). To receive this resource in an accessible format, please contact us at [cmajgroup@cmaj.ca](mailto:cmajgroup@cmaj.ca).

## 10 year Societal Perspective

### Tornado Diagram – ICER Surgery vs. Controls

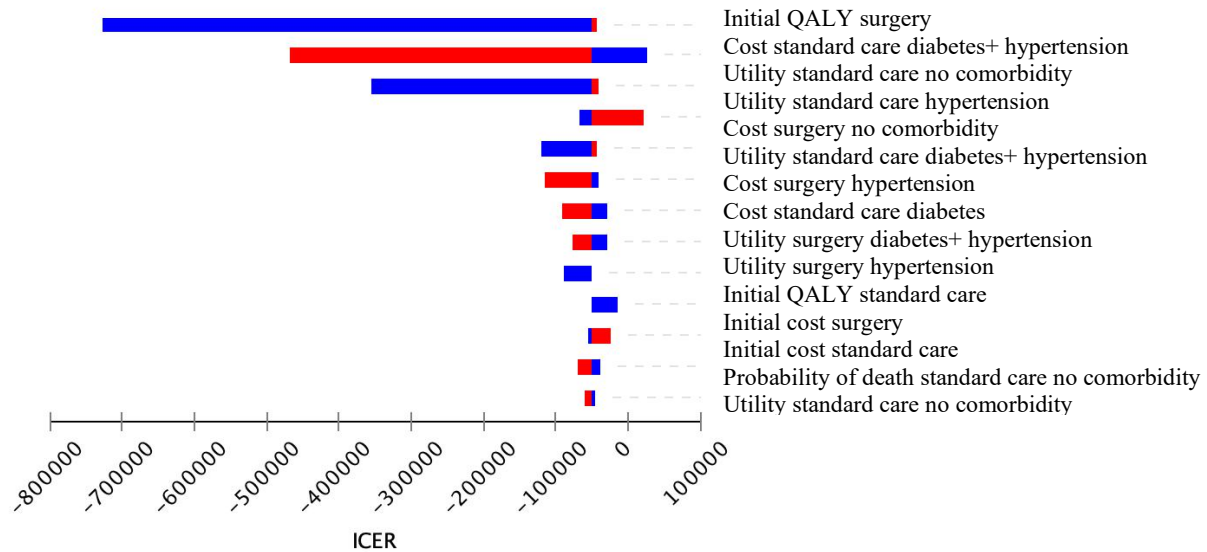

Appendix 6, as supplied by the authors. Appendix to: Lester ELW, Padwal RS, Birch DW, et al. The real world cost-effectiveness of bariatric surgery for the treatment of severe obesity: a cost–utility analysis. *CMAJ Open* 2021. DOI:10.9778/cmajo.20200188.

Copyright © 2021 The Author(s) or their employer(s). To receive this resource in an accessible format, please contact us at [cmajgroup@cmaj.ca](mailto:cmajgroup@cmaj.ca).

## Tornado Diagram – ICER Medical Therapy vs. Controls

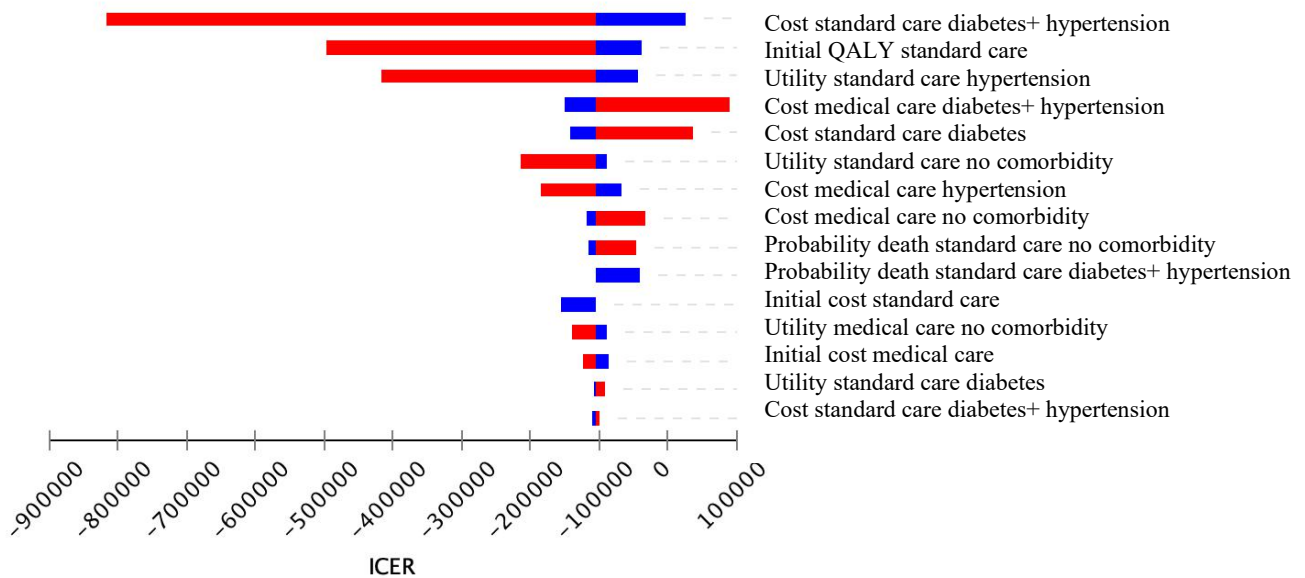

Appendix 6, as supplied by the authors. Appendix to: Lester ELW, Padwal RS, Birch DW, et al. The real world cost-effectiveness of bariatric surgery for the treatment of severe obesity: a cost–utility analysis. *CMAJ Open* 2021. DOI:10.9778/cmajo.20200188.

Copyright © 2021 The Author(s) or their employer(s). To receive this resource in an accessible format, please contact us at [cmajgroup@cmaj.ca](mailto:cmajgroup@cmaj.ca).

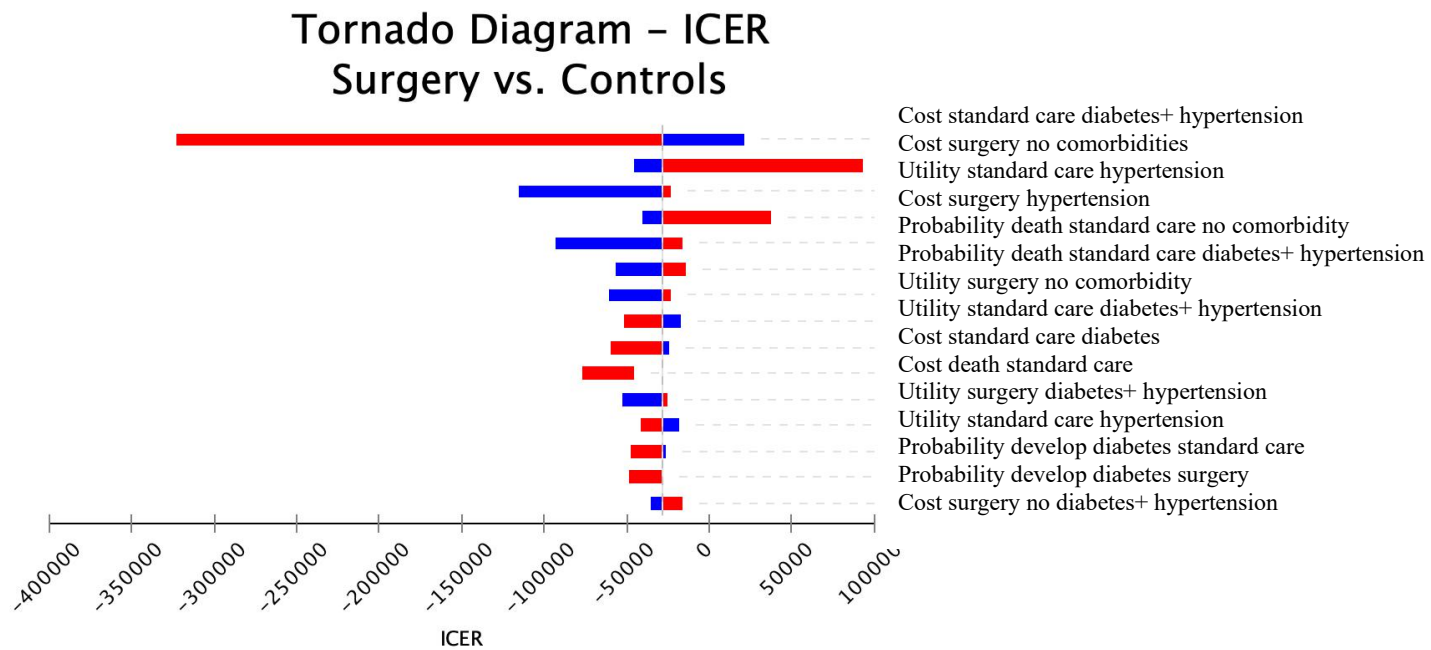

## Tornado Diagram – ICER Medical Therapy vs. Controls

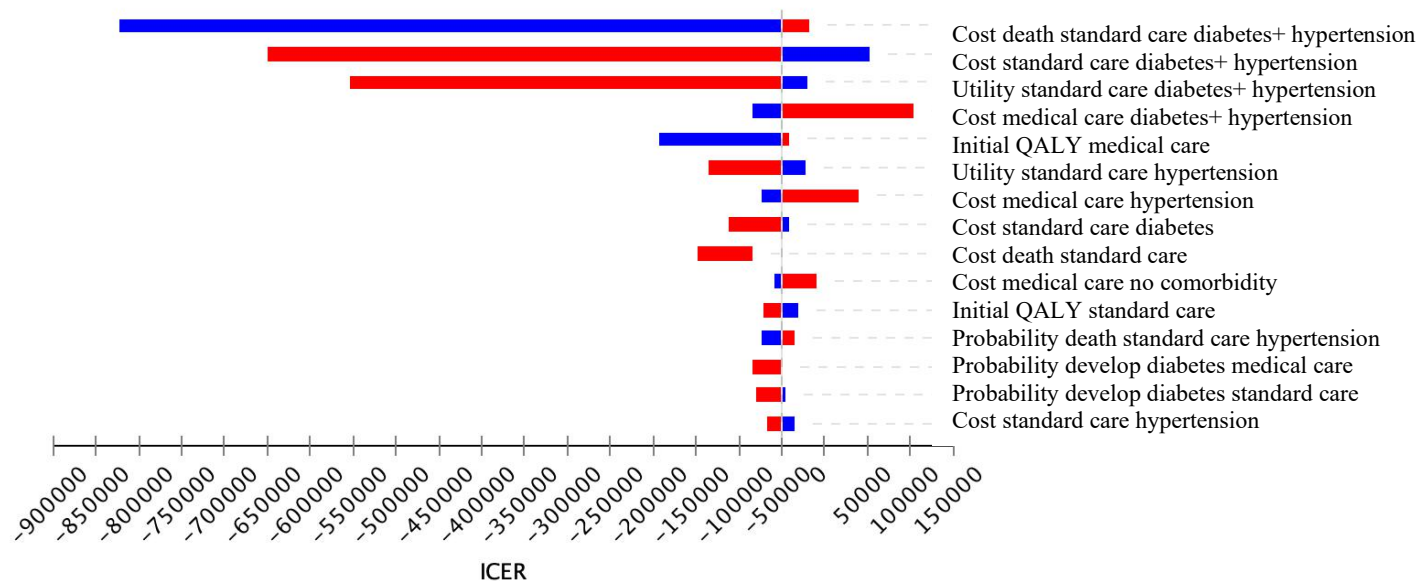

Appendix 6, as supplied by the authors. Appendix to: Lester ELW, Padwal RS, Birch DW, et al. The real world cost-effectiveness of bariatric surgery for the treatment of severe obesity: a cost–utility analysis. *CMAJ Open* 2021. DOI:10.9778/cmajo.20200188.

Copyright © 2021 The Author(s) or their employer(s). To receive this resource in an accessible format, please contact us at [cmajgroup@cmaj.ca](mailto:cmajgroup@cmaj.ca).
